# Supplementary material for: The synergy of different solid-state techniques to elucidate the supramolecular assembly of two 1H-benzotriazole polymorphs
Source: Royal Society of Chemistry journal article supplement (doi:10.1039/c9cp03209f), 2019-01-01
Supplement: c9cp03209f1.pdf [file c9cp03209f1.pdf]

SUPPLEMENTARY INFORMATION

**The synergy of different solid-state techniques to elucidate the supramolecular assembly of two 1*H*-benzotriazole polymorphs**

María Mar Quesada-Moreno,<sup>\*ab</sup> Juan Ramón Avilés-Moreno,<sup>c</sup> Juan Jesús López-González,<sup>a</sup> Fco. Javier Zúñiga,<sup>d</sup> Dolores Santa María,<sup>e</sup> Rosa M. Claramunt,<sup>e</sup> Felipe Reviriego,<sup>f</sup> Ibon Alkorta,<sup>f</sup> José Elguero<sup>f</sup>

<sup>a</sup> Departamento de Química Física y Analítica, Universidad de Jaén, Campus Las Lagunillas, E-23071, Jaén, Spain. Email: [maria.quesada@desy.de](mailto:maria.quesada@desy.de)

<sup>b</sup> Current address: Deutsches Elektronen-Synchrotron DESY, Notkestr. 85, D-22607 Hamburg, Germany.

<sup>c</sup> Departamento de Sistemas Físicos, Químicos y Naturales, Universidad Pablo de Olavide, E-41013, Sevilla, Spain

<sup>d</sup> Fac. Ciencia y Tecnología, Dpto. Física Materia Condensada, Universidad del País Vasco, Apdo. 644, 48080 Bilbao, Spain

<sup>e</sup> Fac. de Ciencias, Dpto. Química Orgánica y Bio-Orgánica, Universidad Nacional de Educación a Distancia (UNED), Senda del Rey 9, E-28040 Madrid, Spain

<sup>f</sup> Instituto de Química Médica, Centro de Química Orgánica "Lora-Tamayo", CSIC, Juan de la Cierva 3, E-28006 Madrid, Spain

This file replaces the one originally published on 2 Sept 2019. The file has been updated to reflect a change in the manuscript title.

## SI1) X-ray powder diffraction

### Diffraction patterns of samples recrystallized in different solvents

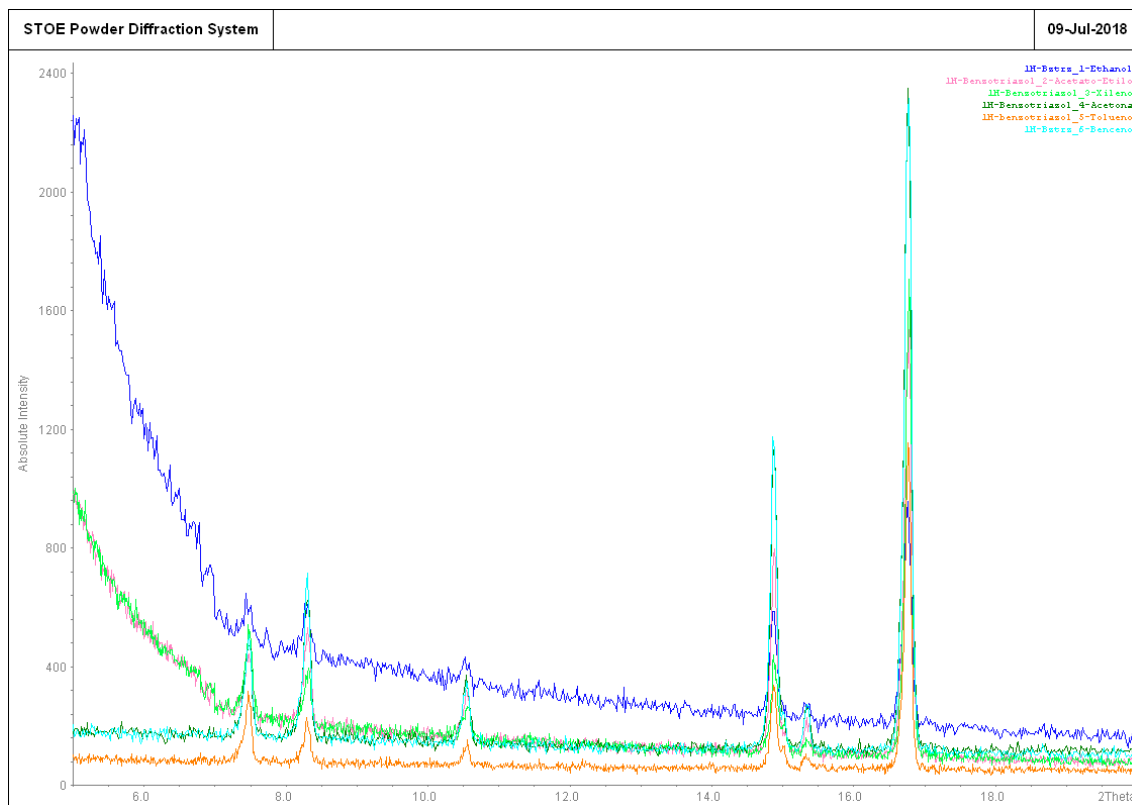

**Figure S1.** XRPD patterns of 1H-Benzotriazole recrystallized in different solvents.

### Rietveld analysis of commercial sample (Madrid)

X-ray powder diffraction (XRPD) pattern of the commercial sample (Madrid) was obtained on a Stoe Stadip diffractometer equipped with a linear position sensitive detector. Data were collected using radiation  $\text{CuK}\alpha 1$  monochromatized with a curved  $\text{Ge}(111)$ , Debye-Scherrer geometry, scans from  $5^\circ$  to  $80^\circ$  with step-size of  $0.01^\circ$  and measuring time of 40 sec./step.

Fraction of  $\alpha/\beta$  phases present in the sample was determined from Rietveld refinement using the software program JANA2006. Structural models of both phases were obtained from CCDC database. (BZTRAZ and BZTRAZ01).

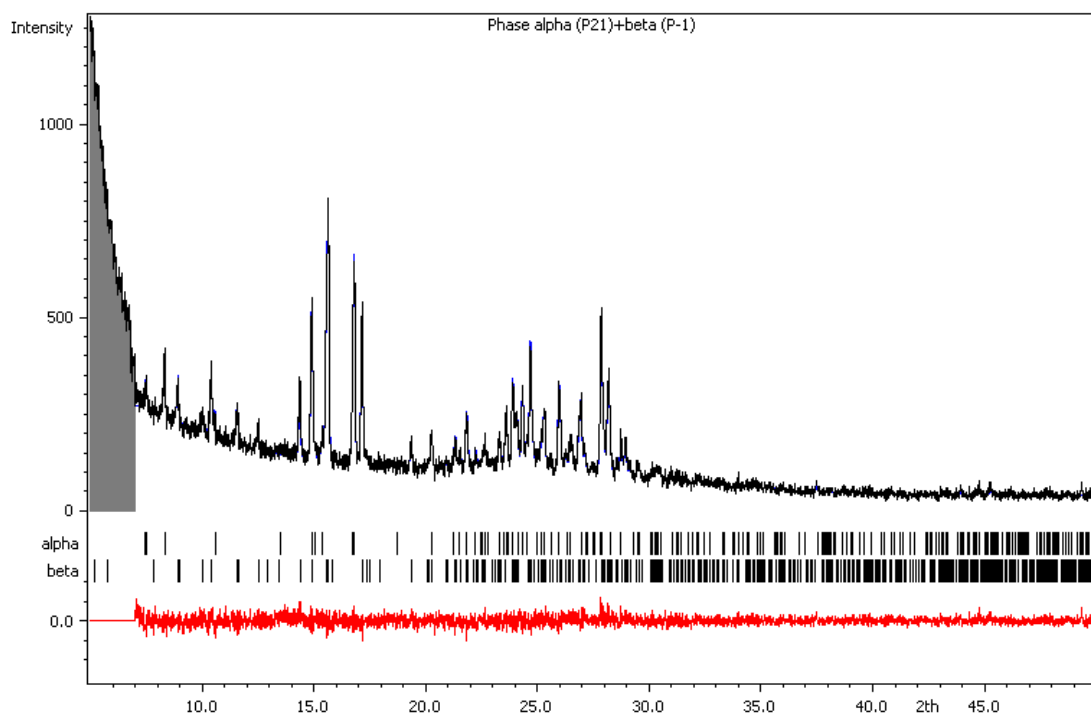

**Figure S2.** Rietveld refinement of the XRPD pattern of the commercial sample containing both polymorphic forms.

**SI2) Optimized geometry and chemical shielding of the decamers at the B3LYP/6-31G(d) computational level.**

**Polymorph 4aa**

| Geometry (Å)                                    | Chemical shielding (ppm) |         |         |
|-------------------------------------------------|--------------------------|---------|---------|
| Atom, X, Y, Z                                   | Atom                     | Abs.    | Rel.    |
| C, 0, 0.0969976861, 6.6760390822, 1.3880272402  | 1C                       | 75.90   | 102.61  |
| C, 0, -1.2539963974, 6.6250200051, 1.607032319  | 2C                       | 76.20   | 102.32  |
| C, 0, -2.1370155848, 7.5969770165, 1.1249673295 | 3C                       | 72.45   | 105.93  |
| C, 0, -1.7189967121, 8.6759787543, 0.3879948725 | 4C                       | 84.34   | 94.48   |
| C, 0, -0.3309760704, 8.7249617141, 0.1490018012 | 5C                       | 62.79   | 115.23  |
| C, 0, 0.551022053, 7.7809657495, 0.6210494755   | 6C                       | 52.95   | 124.71  |
| H, 0, 0.785874043, 5.9256743908, 1.7592829498   | 7H                       | 23.68   | 8.03    |
| H, 0, -1.6635690206, 5.8026859638, 2.1889871131 | 8H                       | 24.62   | 7.12    |
| H, 0, -3.1958435364, 7.4876802922, 1.347536297  | 9H                       | 24.78   | 6.96    |
| H, 0, -2.3963026842, 9.4319888927, 0.0060874257 | 10H                      | 24.16   | 7.56    |
| N, 0, 0.4457447435, 9.6115832897, -0.5701767569 | 11N                      | 22.87   | -173.64 |
| N, 0, 1.7420634231, 9.2199854458, -0.4919864077 | 12N                      | -127.08 | -31.78  |
| N, 0, 1.8322750552, 8.1264820697, 0.2139562553  | 13N                      | -68.23  | -87.46  |
| C, 0, 5.9199919822, 3.4780128758, -1.8780895188 | 14C                      | 75.38   | 103.11  |
| C, 0, 7.1790091224, 4.0360412563, -1.7990688667 | 15C                      | 73.76   | 104.67  |
| C, 0, 7.4099947039, 5.2800021226, -1.2110139435 | 16C                      | 73.31   | 105.10  |
| C, 0, 6.4150190731, 6.0309992588, -0.6589997641 | 17C                      | 89.12   | 89.87   |
| C, 0, 5.1390406626, 5.4818626763, -0.720739459  | 18C                      | 67.11   | 111.07  |

|                                               |     |         |         |
|-----------------------------------------------|-----|---------|---------|
| C,0,4.8810619006,4.2299275985,-1.2859164424   | 19C | 54.54   | 123.18  |
| H,0,3.55835718,6.7986609782,0.0278439029      | 20H | 18.20   | 13.34   |
| H,0,5.7298307194,2.5143331627,-2.3377615084   | 21H | 23.92   | 7.79    |
| H,0,8.0224210401,3.4989381945,-2.2252412759   | 22H | 24.81   | 6.94    |
| H,0,8.4282992817,5.6606648829,-1.1916338686   | 23H | 24.81   | 6.93    |
| H,0,6.6029324225,7.0022606718,-0.2125145069   | 24H | 24.54   | 7.19    |
| N,0,3.9086561959,5.8995616825,-0.3252213629   | 25N | 41.36   | -191.13 |
| N,0,2.9660628652,4.9949757487,-0.6020584332   | 26N | -115.37 | -42.86  |
| N,0,3.5479225492,3.9707915638,-1.1847950828   | 27N | -65.60  | -89.94  |
| C,0,-1.700988748,0.9230107731,-1.1060016286   | 28C | 79.30   | 99.34   |
| C,0,-2.2690344907,1.9780071187,-0.4469844796  | 29C | 77.38   | 101.18  |
| C,0,-1.5369963415,3.1349479125,-0.1220272886  | 30C | 73.90   | 104.54  |
| C,0,-0.204969378,3.2690734684,-0.4159998165   | 31C | 83.26   | 95.52   |
| C,0,0.3689533905,2.1709530733,-1.089960397    | 32C | 61.47   | 116.50  |
| C,0,-0.341997209,1.028966521,-1.4229664509    | 33C | 55.61   | 122.14  |
| H,0,2.4543374032,2.5708124263,-1.5272127067   | 34H | 16.03   | 15.45   |
| H,0,-2.2641571915,0.0336858807,-1.3725109738  | 35H | 24.60   | 7.13    |
| H,0,-3.3223835922,1.9384711366,-0.1794079442  | 36H | 25.24   | 6.52    |
| H,0,-2.0497995055,3.9506559982,0.3819608277   | 37H | 25.14   | 6.61    |
| H,0,0.3647219856,4.1619869591,-0.1840745415   | 38H | 24.04   | 7.68    |
| N,0,1.6381143332,1.945123763,-1.574107449     | 39N | 30.27   | -180.63 |
| N,0,1.6899638996,0.7389988179,-2.1610198603   | 40N | -122.87 | -35.76  |
| N,0,0.4999940141,0.1789922748,-2.0940107356   | 41N | -89.64  | -67.20  |
| C,0,2.0209568628,12.6980112313,-3.0120363881  | 42C | 79.24   | 99.39   |
| C,0,2.5900370829,13.7529922008,-3.6710231643  | 43C | 74.72   | 103.75  |
| C,0,1.8570092726,14.9099556357,-3.9959513766  | 44C | 71.48   | 106.87  |
| C,0,0.5249808465,15.0440854061,-3.7020055283  | 45C | 83.10   | 95.67   |
| C,0,-0.0479623979,13.9460242945,-3.028038003  | 46C | 61.64   | 116.34  |
| C,0,0.662937154,12.8040486938,-2.6940422449   | 47C | 56.57   | 121.23  |
| H,0,-2.1392870258,14.3476730604,-2.5937862784 | 48H | 15.48   | 15.99   |
| H,0,2.5852167929,11.8103707301,-2.7413799875  | 49H | 24.01   | 7.71    |
| H,0,3.6428128714,13.7114392258,-3.9375793592  | 50H | 24.93   | 6.82    |
| H,0,2.3679130676,15.7261590839,-4.5000915024  | 51H | 24.87   | 6.87    |
| H,0,-0.047372256,15.9351647436,-3.9335328902  | 52H | 23.84   | 7.88    |
| N,0,-1.317146244,13.7201325392,-2.5440268599  | 53N | 27.08   | -177.62 |
| N,0,-1.3700340391,12.5140407542,-1.9569756141 | 54N | -121.26 | -37.29  |
| N,0,-0.1797364958,11.9535197816,-2.022731415  | 55N | -61.26  | -94.05  |
| C,0,-5.599991393,15.2530106281,-2.2389069496  | 56C | 75.89   | 102.62  |
| C,0,-6.8580082266,15.8110428575,-2.3189290492 | 57C | 73.25   | 105.16  |
| C,0,-7.0889954098,17.0550014189,-2.9069895653 | 58C | 72.89   | 105.51  |
| C,0,-6.0950182111,17.805993157,-3.459006487   | 59C | 88.68   | 90.30   |
| C,0,-4.818040693,17.256854495,-3.3972678003   | 60C | 66.93   | 111.25  |
| C,0,-4.5610600169,16.0049305597,-2.8320811755 | 61C | 54.43   | 123.28  |
| H,0,-3.2361867193,18.5737090217,-4.1461131586 | 62H | 18.12   | 13.42   |
| H,0,-5.4112463416,14.2892437133,-1.7789364988 | 63H | 23.87   | 7.84    |
| H,0,-7.7017629353,15.2743602513,-1.8931209487 | 64H | 24.72   | 7.02    |
| H,0,-8.1073814462,17.4350572143,-2.926450878  | 65H | 24.75   | 6.99    |
| H,0,-6.2829647683,18.7770026838,-3.905774562  | 66H | 24.51   | 7.23    |
| N,0,-3.5876523349,17.6745753036,-3.7927647273 | 67N | 40.98   | -190.77 |
| N,0,-2.6460537479,16.7699799421,-3.5159301875 | 68N | -113.97 | -44.18  |
| N,0,-3.2269341296,15.7458158594,-2.9331958298 | 69N | -61.59  | -93.74  |
| C,0,0.2230038219,18.4510452895,-5.5060243831  | 70C | 76.21   | 102.31  |
| C,0,1.5739976617,18.4000156058,-5.7250386751  | 71C | 76.07   | 102.45  |

|                                               |      |         |         |
|-----------------------------------------------|------|---------|---------|
| C,0,2.4570133858,19.3719767073,-5.2419612926  | 72C  | 72.50   | 105.88  |
| C,0,2.0399979629,20.4509776876,-4.5049921821  | 73C  | 83.80   | 95.00   |
| C,0,0.650975919,20.4999666122,-4.267009181    | 74C  | 62.66   | 115.35  |
| C,0,-0.2310250588,19.5559665392,-4.7380543262 | 75C  | 52.69   | 124.96  |
| H,0,-0.4669563068,17.7037419882,-5.881695469  | 76H  | 23.69   | 8.02    |
| H,0,1.9836355882,17.5807400433,-6.3114638531  | 77H  | 24.63   | 7.11    |
| H,0,3.5156121119,19.2630558326,-5.465767392   | 78H  | 24.73   | 7.02    |
| H,0,2.7172059141,21.207288039,-4.1237169879   | 79H  | 24.11   | 7.62    |
| N,0,-0.1257434778,21.38658176,-3.5478230812   | 80N  | 22.63   | -173.41 |
| N,0,-1.4210660563,20.9949899586,-3.6250195905 | 81N  | -127.74 | -31.16  |
| N,0,-1.5122753805,19.9014649068,-4.3319460821 | 82N  | -67.84  | -87.82  |
| C,0,-1.7009557551,24.4730112067,-1.1059640695 | 83C  | 79.22   | 99.41   |
| C,0,-2.2690392088,25.527992103,-0.4469762355  | 84C  | 74.68   | 103.78  |
| C,0,-1.5370074658,26.684956659,-0.1220485575  | 85C  | 71.55   | 106.79  |
| C,0,-0.2049832299,26.8190843908,-0.4159977301 | 86C  | 83.29   | 95.49   |
| C,0,0.3689634174,25.7210226746,-1.0899591901  | 87C  | 61.78   | 116.21  |
| C,0,-0.341936961,24.5790464428,-1.422954759   | 88C  | 56.73   | 121.07  |
| H,0,2.4606528036,26.1222947891,-1.5244725077  | 89H  | 15.47   | 15.99   |
| H,0,-2.2653576676,23.5855665314,-1.3766942737 | 90H  | 23.97   | 7.75    |
| H,0,-3.3218633662,25.4865449008,-0.180484479  | 91H  | 24.92   | 6.83    |
| H,0,-2.0485432199,27.5005724177,0.3823522019  | 92H  | 24.89   | 6.85    |
| H,0,0.3677793421,27.7098456068,-0.1843126235  | 93H  | 23.87   | 7.85    |
| N,0,1.6381546624,25.4951444288,-1.5739775643  | 94N  | 27.15   | -177.69 |
| N,0,1.6900325416,24.2890383483,-2.1610249256  | 95N  | -121.13 | -37.41  |
| N,0,0.4997338088,23.7285204959,-2.0942697772  | 96N  | -60.49  | -94.78  |
| C,0,5.9199919276,27.0280097955,-1.8780943394  | 97C  | 75.79   | 102.71  |
| C,0,7.179006894,27.5860450375,-1.7990718587   | 98C  | 72.91   | 105.49  |
| C,0,7.4099965421,28.8300019468,-1.2110094319  | 99C  | 72.62   | 105.77  |
| C,0,6.4150190527,29.580988821,-0.6589883858   | 100C | 88.74   | 90.25   |
| C,0,5.1390409434,29.0318575165,-0.7207396972  | 101C | 66.93   | 111.25  |
| C,0,4.8810608209,27.7799330231,-1.2859213401  | 102C | 54.57   | 123.15  |
| H,0,3.5607848663,30.3472313323,0.0323808435   | 103H | 18.22   | 13.33   |
| H,0,5.731557303,26.0640102688,-2.3377005411   | 104H | 23.84   | 7.88    |
| H,0,8.0223922291,27.048808524,-2.2246777635   | 105H | 24.69   | 7.05    |
| H,0,8.4282333582,29.2102153233,-1.1909991286  | 106H | 24.74   | 7.00    |
| H,0,6.6033500358,30.5515020998,-0.2112863659  | 107H | 24.53   | 7.21    |
| N,0,3.9086563566,29.4495763926,-0.3252446407  | 108N | 41.30   | -191.07 |
| N,0,2.9660551084,28.544985491,-0.6020773779   | 109N | -113.53 | -44.61  |
| N,0,3.547926364,27.5207967014,-1.1847814532   | 110N | -61.70  | -93.63  |
| C,0,0.0969960017,30.2260420599,1.388019574    | 111C | 75.97   | 102.54  |
| C,0,-1.2539966348,30.1750154001,1.6070371623  | 112C | 75.34   | 103.14  |
| C,0,-2.1370141207,31.1469764292,1.1249623045  | 113C | 72.00   | 106.36  |
| C,0,-1.7189990489,32.2259761697,0.3879901433  | 114C | 84.24   | 94.58   |
| C,0,-0.3309828272,32.2749806558,0.1490148512  | 115C | 62.96   | 115.07  |
| C,0,0.5510251782,31.330970488,0.6210604102    | 116C | 52.39   | 125.25  |
| H,0,0.7868953368,29.4786704657,1.7634287785   | 117H | 23.64   | 8.07    |
| H,0,-1.6632952885,29.3555751658,2.1931807773  | 118H | 24.60   | 7.14    |
| H,0,-3.1954688537,31.0389518156,1.3490444815  | 119H | 24.69   | 7.05    |
| H,0,-2.3980634017,32.9813475575,0.0079977491  | 120H | 24.25   | 7.48    |
| N,0,0.4457775434,33.1615403378,-0.5701639351  | 121N | 26.12   | -176.71 |
| N,0,1.7420615993,32.7700009858,-0.4919607588  | 122N | -125.68 | -33.11  |
| N,0,1.8322658418,31.6764734815,0.2139343824   | 123N | -70.29  | -85.51  |
| C,0,2.020961329,36.2480082285,-3.0120308961   | 124C | 77.68   | 100.90  |

|                                               |      |         |         |
|-----------------------------------------------|------|---------|---------|
| C,0,2.5900219469,37.302988617,-3.6710046712   | 125C | 72.55   | 105.83  |
| C,0,1.8570057403,38.4600015377,-3.9959836852  | 126C | 69.14   | 109.12  |
| C,0,0.5249992922,38.5940206758,-3.7020064637  | 127C | 86.69   | 92.22   |
| C,0,-0.0479830374,37.4960603585,-3.0279577522 | 128C | 63.69   | 114.37  |
| C,0,0.6629478922,36.3540610628,-2.6940161855  | 129C | 57.20   | 120.62  |
| H,0,-2.1528285235,37.8352758525,-2.5904192559 | 130H | 21.36   | 10.28   |
| H,0,2.5832921276,35.3596865712,-2.7410369689  | 131H | 23.75   | 7.96    |
| H,0,3.6415839276,37.2618508749,-3.9394196611  | 132H | 24.71   | 7.03    |
| H,0,2.3681847314,39.2691417839,-4.510829349   | 133H | 24.74   | 7.01    |
| H,0,-0.0432021584,39.4828737854,-3.9541644961 | 134H | 24.72   | 7.02    |
| N,0,-1.3170461859,37.2700510197,-2.5441202632 | 135N | 47.83   | -197.25 |
| N,0,-1.3700365667,36.0640551869,-1.9569490043 | 136N | -122.29 | -36.31  |
| N,0,-0.1798031413,35.5035243717,-2.0228378687 | 137N | -69.54  | -86.22  |
| H,0,0.1920521098,10.4645520885,-1.1091753906  | 138H | 14.96   | 16.49   |
| H,0,0.1280725287,22.2399467502,-3.0084832483  | 139H | 14.90   | 16.54   |
| H,0,0.1922780767,34.0084564222,-1.1048154281  | 140H | 15.50   | 15.96   |

### Polymorph 4a $\beta$

| Geometry (Å)                                 | Chemical shielding (ppm) |         |         |
|----------------------------------------------|--------------------------|---------|---------|
| Atom, X, Y, Z                                | Atom                     | Abs.    | Rel.    |
| N,0,0.3156426946,2.5887159875,-7.4607136067  | 1N                       | 34.80   | -184.92 |
| H,0,-0.1487313773,1.7450198222,-7.8372572555 | 2H                       | 16.52   | 14.97   |
| N,0,0.1887505542,2.8761486533,-6.1531550114  | 3N                       | -117.88 | -40.48  |
| N,0,0.7838504946,4.0135137001,-5.9288935425  | 4N                       | -62.04  | -93.31  |
| C,0,1.9991202712,5.6456978588,-7.4019545957  | 5C                       | 80.70   | 97.99   |
| H,0,2.2402048497,6.3584689543,-6.6190872139  | 6H                       | 24.22   | 7.51    |
| C,0,2.3553174261,5.8418970692,-8.6928427133  | 7C                       | 76.68   | 101.86  |
| H,0,2.9026272668,6.7402872402,-8.9670924098  | 8H                       | 24.90   | 6.84    |
| C,0,2.0344460121,4.9248544537,-9.6926787431  | 9C                       | 72.78   | 105.61  |
| H,0,2.3396313852,5.1351974443,-10.7144992181 | 10H                      | 24.84   | 6.90    |
| C,0,1.3607994754,3.7707196717,-9.424876506   | 11C                      | 87.97   | 90.99   |
| H,0,1.1057654187,3.0564711574,-10.201401491  | 12H                      | 24.43   | 7.31    |
| C,0,0.9917720884,3.5730920086,-8.1060266661  | 13C                      | 67.47   | 110.73  |
| C,0,1.2910649468,4.4794708121,-7.1110611991  | 14C                      | 57.47   | 120.36  |
| N,0,0.8653289571,4.3068528216,-3.1143721108  | 15N                      | 33.53   | -183.72 |
| H,0,0.7416158007,4.4387244057,-4.1328300205  | 16H                      | 15.94   | 15.53   |
| N,0,0.4141785179,5.1981235399,-2.2184772429  | 17N                      | -113.87 | -44.28  |
| N,0,0.7088723256,4.7579304387,-1.0208686844  | 18N                      | -56.76  | -98.31  |
| C,0,1.8950054872,2.6794307513,-0.1934247727  | 19C                      | 80.24   | 98.43   |
| H,0,1.8193738558,2.8977252545,0.8676852199   | 20H                      | 24.54   | 7.20    |
| C,0,2.4844964623,1.5471919821,-0.6656269167  | 21C                      | 76.63   | 101.91  |
| H,0,2.9032214398,0.8328359998,0.0387054053   | 22H                      | 25.62   | 6.15    |
| C,0,2.5681691368,1.2729739543,-2.0298056881  | 23C                      | 75.12   | 103.35  |
| H,0,3.0351915925,0.3446701977,-2.3468545153  | 24H                      | 25.57   | 6.20    |
| C,0,2.0694481271,2.1093929466,-2.9614077632  | 25C                      | 89.37   | 89.64   |
| H,0,2.1083451806,1.8813918441,-4.0208957154  | 26H                      | 24.99   | 6.76    |
| C,0,1.4621938883,3.2657465499,-2.4974027222  | 27C                      | 67.39   | 110.80  |
| C,0,1.3596409193,3.5568451473,-1.1483070207  | 28C                      | 56.07   | 121.70  |

|                                                |     |         |         |
|------------------------------------------------|-----|---------|---------|
| N,0,-0.3464363447,5.9408717674,1.3532017752    | 29N | 32.26   | -182.52 |
| H,0,0.0383502175,5.5164705377,0.4815326475     | 30H | 15.38   | 16.08   |
| N,0,-0.2379979435,5.2807638586,2.5104481182    | 31N | -116.55 | -41.74  |
| N,0,-0.7439628577,6.0206367017,3.4625962493    | 32N | -58.11  | -97.02  |
| C,0,-1.7689938773,8.3196470459,3.4617822406    | 33C | 80.13   | 98.54   |
| H,0,-1.9609358696,8.3808162293,4.5286304288    | 34H | 24.26   | 7.46    |
| C,0,-2.0836483557,9.3315185057,2.6062337746    | 35C | 77.24   | 101.32  |
| H,0,-2.5423572579,10.2359244147,2.9984170898   | 36H | 24.98   | 6.77    |
| C,0,-1.8391294761,9.2447902383,1.244581838     | 37C | 76.18   | 102.34  |
| H,0,-2.1209924339,10.0851758978,0.6139572446   | 38H | 24.96   | 6.79    |
| C,0,-1.2748208259,8.163219257,0.6806699273     | 39C | 89.91   | 89.12   |
| H,0,-1.0812511116,8.0948064565,-0.3857814757   | 40H | 24.35   | 7.38    |
| C,0,-0.9318754291,7.1352506411,1.5418306591    | 41C | 68.49   | 109.74  |
| C,0,-1.1787943949,7.1858406382,2.8994541833    | 42C | 57.03   | 120.78  |
| N,0,-1.2318227735,3.9156959313,5.4768223806    | 43N | 32.53   | -182.77 |
| H,0,-1.1028849348,4.7816219977,4.9236627761    | 44H | 16.73   | 14.77   |
| N,0,-0.3300200315,3.6275371918,6.4454011208    | 45N | -124.97 | -33.78  |
| N,0,-0.5727340551,2.410774186,6.8679030377     | 46N | -62.86  | -92.54  |
| C,0,-2.2486041294,0.6569286357,6.2003562763    | 47C | 79.94   | 98.71   |
| H,0,-1.9048399658,-0.1042605062,6.8940457703   | 48H | 24.13   | 7.59    |
| C,0,-3.2798855324,0.4346838896,5.3488222476    | 49C | 77.83   | 100.75  |
| H,0,-3.796353295,-0.5211186043,5.3618348665    | 50H | 25.20   | 6.56    |
| C,0,-3.7166040783,1.4273917136,4.472716277     | 51C | 74.39   | 104.06  |
| H,0,-4.5627941764,1.2121700988,3.8240549089    | 52H | 25.08   | 6.67    |
| C,0,-3.1259838672,2.6432512125,4.3939031581    | 53C | 89.11   | 89.89   |
| H,0,-3.4639092457,3.4040730044,3.6974628797    | 54H | 25.17   | 6.59    |
| C,0,-2.0549444327,2.8709591623,5.2564419994    | 55C | 67.06   | 111.12  |
| C,0,-1.6274436273,1.9033185808,6.1502867996    | 56C | 55.66   | 122.09  |
| N,0,-1.1472916891,-0.99470028,-8.6303805852    | 57N | 35.98   | -186.04 |
| H,0,-0.5142477608,-1.5281671531,-7.9994722183  | 58H | 15.18   | 16.28   |
| N,0,-1.0913855237,0.3428626803,-8.6747675121   | 59N | -88.92  | -67.88  |
| N,0,-1.9821834241,0.7905012377,-9.5180177995   | 60N | -80.89  | -75.48  |
| C,0,-3.6706516637,-0.3760215647,-10.9729309544 | 61C | 77.89   | 100.70  |
| H,0,-4.0928115442,0.5191633238,-11.4175455001  | 62H | 24.28   | 7.45    |
| C,0,-4.1020369808,-1.6281205191,-11.287755754  | 63C | 77.14   | 101.41  |
| H,0,-4.9054482191,-1.7434013594,-12.0118529609 | 64H | 25.00   | 6.75    |
| C,0,-3.5642076781,-2.7679387131,-10.7102410209 | 65C | 74.90   | 103.58  |
| H,0,-3.9598396667,-3.7380737578,-11.0009698609 | 66H | 24.91   | 6.84    |
| C,0,-2.5644394743,-2.7070598709,-9.8040175884  | 67C | 88.98   | 90.01   |
| H,0,-2.1430889073,-3.5980321174,-9.3475503361  | 68H | 24.32   | 7.41    |
| C,0,-2.1062127912,-1.4428780041,-9.4742786252  | 69C | 67.89   | 110.32  |
| C,0,-2.6298133733,-0.2951959539,-10.0365127373 | 70C | 55.58   | 122.17  |
| N,0,1.2318227735,-3.9156959313,-5.4768223806   | 71N | 32.53   | -182.77 |
| H,0,1.1028849348,-4.7816219977,-4.9236627761   | 72H | 16.73   | 14.77   |
| N,0,0.3300200315,-3.6275371918,-6.4454011208   | 73N | -124.97 | -33.78  |
| N,0,0.5727340551,-2.410774186,-6.8679030377    | 74N | -62.86  | -92.54  |
| C,0,2.2486041294,-0.6569286357,-6.2003562763   | 75C | 79.94   | 98.71   |
| H,0,1.9048399658,0.1042605062,-6.8940457703    | 76H | 24.13   | 7.59    |
| C,0,3.2798855324,-0.4346838896,-5.3488222476   | 77C | 77.83   | 100.75  |
| H,0,3.796353295,0.5211186043,-5.3618348665     | 78H | 25.20   | 6.56    |
| C,0,3.7166040783,-1.4273917136,-4.472716277    | 79C | 74.39   | 104.06  |
| H,0,4.5627941764,-1.2121700988,-3.8240549089   | 80H | 25.08   | 6.67    |
| C,0,3.1259838672,-2.6432512125,-4.3939031581   | 81C | 89.11   | 89.89   |

|                                               |      |         |         |
|-----------------------------------------------|------|---------|---------|
| H,0,3.4639092457,-3.4040730044,-3.6974628797  | 82H  | 25.17   | 6.59    |
| C,0,2.0549444327,-2.8709591623,-5.2564419994  | 83C  | 67.06   | 111.12  |
| C,0,1.6274436273,-1.9033185808,-6.1502867996  | 84C  | 55.66   | 122.09  |
| N,0,0.3464363447,-5.9408717674,-1.3532017752  | 85N  | 32.26   | -182.52 |
| H,0,-0.0383502175,-5.5164705377,-0.4815326475 | 86H  | 15.38   | 16.08   |
| N,0,0.2379979435,-5.2807638586,-2.5104481182  | 87N  | -116.55 | -41.74  |
| N,0,0.7439628577,-6.0206367017,-3.4625962493  | 88N  | -58.11  | -97.02  |
| C,0,1.7689938773,-8.3196470459,-3.4617822406  | 89C  | 80.13   | 98.54   |
| H,0,1.9609358696,-8.3808162293,-4.5286304288  | 90H  | 24.26   | 7.46    |
| C,0,2.0836483557,-9.3315185057,-2.6062337746  | 91C  | 77.24   | 101.32  |
| H,0,2.5423572579,-10.2359244147,-2.9984170898 | 92H  | 24.98   | 6.77    |
| C,0,1.8391294761,-9.2447902383,-1.244581838   | 93C  | 76.18   | 102.34  |
| H,0,2.1209924339,-10.0851758978,-0.6139572446 | 94H  | 24.96   | 6.79    |
| C,0,1.2748208259,-8.163219257,-0.6806699273   | 95C  | 89.91   | 89.12   |
| H,0,1.0812511116,-8.0948064565,0.3857814757   | 96H  | 24.35   | 7.38    |
| C,0,0.9318754291,-7.1352506411,-1.5418306591  | 97C  | 68.49   | 109.74  |
| C,0,1.1787943949,-7.1858406382,-2.8994541833  | 98C  | 57.03   | 120.78  |
| N,0,-0.8653289571,-4.3068528216,3.1143721108  | 99N  | 33.53   | -183.72 |
| H,0,-0.7416158007,-4.4387244057,4.1328300205  | 100H | 15.94   | 15.53   |
| N,0,-0.4141785179,-5.1981235399,2.2184772429  | 101N | -113.87 | -44.28  |
| N,0,-0.7088723256,-4.7579304387,1.0208686844  | 102N | -56.76  | -98.31  |
| C,0,-1.8950054872,-2.6794307513,0.1934247727  | 103C | 80.24   | 98.43   |
| H,0,-1.8193738558,-2.8977252545,-0.8676852199 | 104H | 24.54   | 7.20    |
| C,0,-2.4844964623,-1.5471919821,0.6656269167  | 105C | 76.63   | 101.91  |
| H,0,-2.9032214398,-0.8328359998,-0.0387054053 | 106H | 25.62   | 6.15    |
| C,0,-2.5681691368,-1.2729739543,2.0298056881  | 107C | 75.12   | 103.35  |
| H,0,-3.0351915925,-0.3446701977,2.3468545153  | 108H | 25.57   | 6.20    |
| C,0,-2.0694481271,-2.1093929466,2.9614077632  | 109C | 89.37   | 89.64   |
| H,0,-2.1083451806,-1.8813918441,4.0208957154  | 110H | 24.99   | 6.76    |
| C,0,-1.4621938883,-3.2657465499,2.4974027222  | 111C | 67.39   | 110.80  |
| C,0,-1.3596409193,-3.5568451473,1.1483070207  | 112C | 56.07   | 121.70  |
| N,0,-0.3156426946,-2.5887159875,7.4607136067  | 113N | 34.80   | -184.92 |
| H,0,0.1487313773,-1.7450198222,7.8372572555   | 114H | 16.52   | 14.97   |
| N,0,-0.1887505542,-2.8761486533,6.1531550114  | 115N | -117.88 | -40.48  |
| N,0,-0.7838504946,-4.0135137001,5.9288935425  | 116N | -62.04  | -93.31  |
| C,0,-1.9991202712,-5.6456978588,7.4019545957  | 117C | 80.70   | 97.99   |
| H,0,-2.2402048497,-6.3584689543,6.6190872139  | 118H | 24.22   | 7.51    |
| C,0,-2.3553174261,-5.8418970692,8.6928427133  | 119C | 76.68   | 101.86  |
| H,0,-2.9026272668,-6.7402872402,8.9670924098  | 120H | 24.90   | 6.84    |
| C,0,-2.0344460121,-4.9248544537,9.6926787431  | 121C | 72.78   | 105.61  |
| H,0,-2.3396313852,-5.1351974443,10.7144992181 | 122H | 24.84   | 6.90    |
| C,0,-1.3607994754,-3.7707196717,9.424876506   | 123C | 87.97   | 90.99   |
| H,0,-1.1057654187,-3.0564711574,10.201401491  | 124H | 24.43   | 7.31    |
| C,0,-0.9917720884,-3.5730920086,8.1060266661  | 125C | 67.47   | 110.73  |
| C,0,-1.2910649468,-4.4794708121,7.1110611991  | 126C | 57.47   | 120.36  |
| N,0,1.1472916891,0.99470028,8.6303805852      | 127N | 35.98   | -186.04 |
| H,0,0.5142477608,1.5281671531,7.9994722183    | 128H | 15.18   | 16.28   |
| N,0,1.0913855237,-0.3428626803,8.6747675121   | 129N | -88.92  | -67.88  |
| N,0,1.9821834241,-0.7905012377,9.5180177995   | 130N | -80.89  | -75.48  |
| C,0,3.6706516637,0.3760215647,10.9729309544   | 131C | 77.89   | 100.70  |
| H,0,4.0928115442,-0.5191633238,11.4175455001  | 132H | 24.28   | 7.45    |
| C,0,4.1020369808,1.6281205191,11.287755754    | 133C | 77.14   | 101.41  |
| H,0,4.9054482191,1.7434013594,12.0118529609   | 134H | 25.00   | 6.75    |



|                                             |      |       |        |
|---------------------------------------------|------|-------|--------|
| C,0,3.5642076781,2.7679387131,10.7102410209 | 135C | 74.90 | 103.58 |
| H,0,3.9598396667,3.7380737578,11.0009698609 | 136H | 24.91 | 6.84   |
| C,0,2.5644394743,2.7070598709,9.8040175884  | 137C | 88.98 | 90.01  |
| H,0,2.1430889073,3.5980321174,9.3475503361  | 138H | 24.32 | 7.41   |
| C,0,2.1062127912,1.4428780041,9.4742786252  | 139C | 67.89 | 110.32 |
| C,0,2.6298133733,0.2951959539,10.0365127373 | 140C | 55.58 | 122.17 |

### S13) Theoretical and experimental FarIR, IR and Raman of 4a $\alpha$ crystals crystallized from acetone and toluene

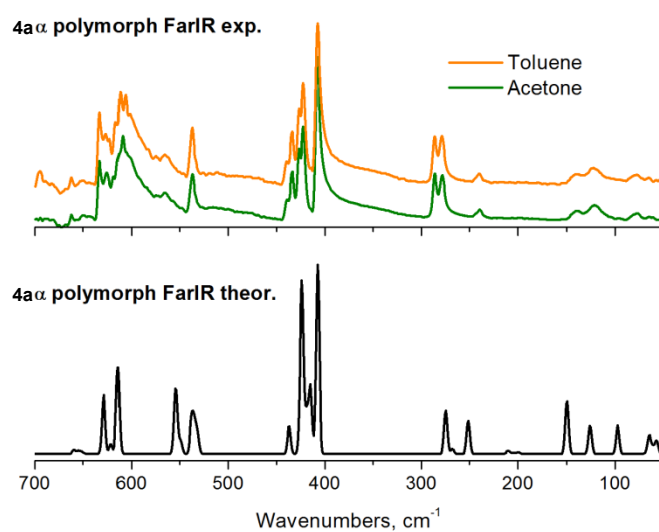

**Figure S3.** Experimental (top) and scaled predicted (bottom) FarIR spectra of the samples of 4a $\alpha$  polymorph crystallized in toluene (orange) and acetone (green) in the solid phase (powder) in the 700–50 cm<sup>-1</sup> spectral region. A scaling frequency factor of 0.97 was used. Gaussian function, pitch = 1 cm<sup>-1</sup>, FWHM (Full Width Half Maximum) = 4 cm<sup>-1</sup>. All the FarIR experimental spectra have been normalized.

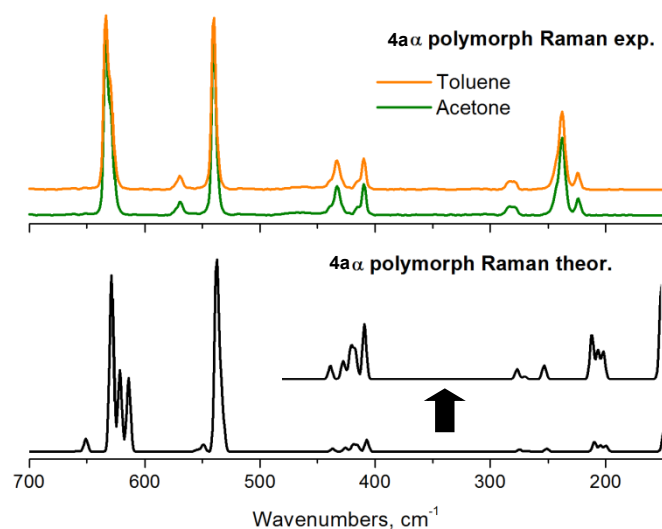

**Figure S4.** Experimental (top) and scaled predicted (bottom) Raman spectra of the samples of **4a $\alpha$**  polymorph crystallized in toluene (orange) and acetone (green) in the solid phase (powder) in the 700–150 cm<sup>-1</sup> spectral region. A scaling frequency factor of 0.97 was used. Gaussian function, pitch = 1 cm<sup>-1</sup>, FWHM (Full Width Half Maximum) = 4 cm<sup>-1</sup>. All the Raman experimental spectra have been normalized.

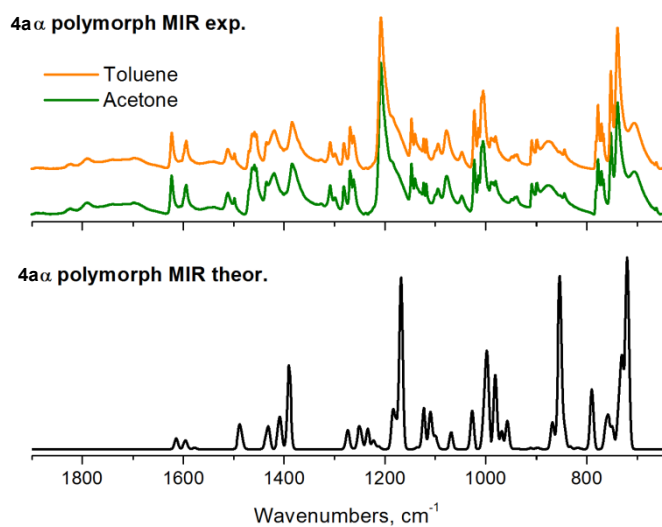

**Figure S5.** Experimental (top) and scaled predicted (bottom) IR spectra of the samples of **4a $\alpha$**  polymorph crystallized in toluene (orange) and acetone (green) in the solid phase (powder) in the 1900–650 cm<sup>-1</sup> spectral region. A scaling frequency factor of 0.94 was used. Gaussian function, pitch = 1 cm<sup>-1</sup>, FWHM (Full Width Half Maximum) = 8 cm<sup>-1</sup>. All the IR experimental spectra have been normalized.

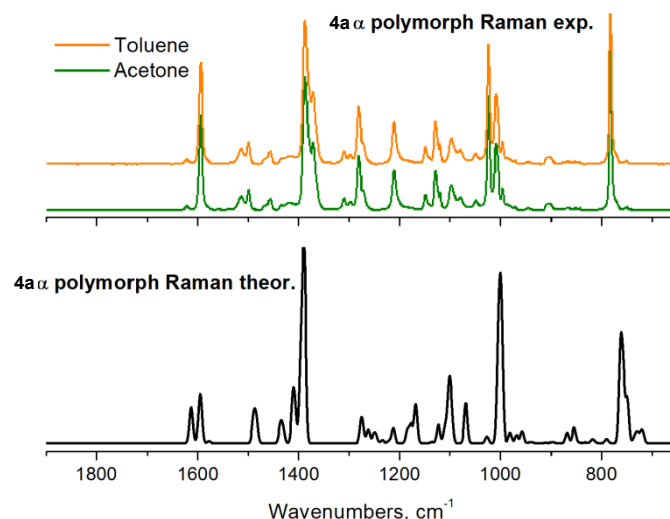

**Figure S6.** Experimental (top) and scaled predicted (bottom) Raman spectra of the samples of **4a $\alpha$**  polymorph crystallized in toluene (orange) and acetone (green) in the solid phase (powder) in the 1900–650  $\text{cm}^{-1}$  spectral region. A scaling frequency factor of 0.94 was used. Gaussian function, pitch = 1  $\text{cm}^{-1}$ , FWHM (Full Width Half Maximum) = 8  $\text{cm}^{-1}$ . All the Raman experimental spectra have been normalized.

#### SI4) Experimental comparison of FarIR, IR and Raman spectra of **4a $\alpha$** and **4a $\beta$** polymorphs and those of the Madrid commercial sample

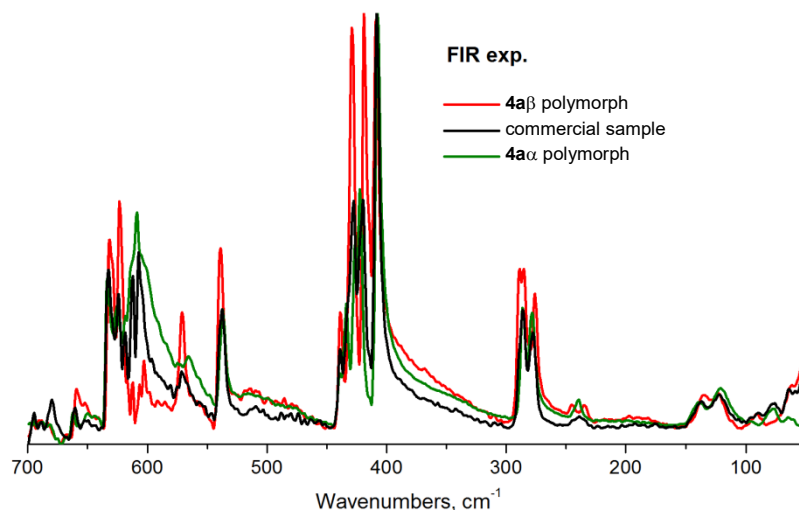

**Figure S7.** Experimental FarIR spectra of **4a $\beta$**  polymorph (red), Madrid commercial sample (black) and **4a $\alpha$**  polymorph (green) in the solid phase (powder) in the 700-50  $\text{cm}^{-1}$  spectral region. The three spectra have been normalized.

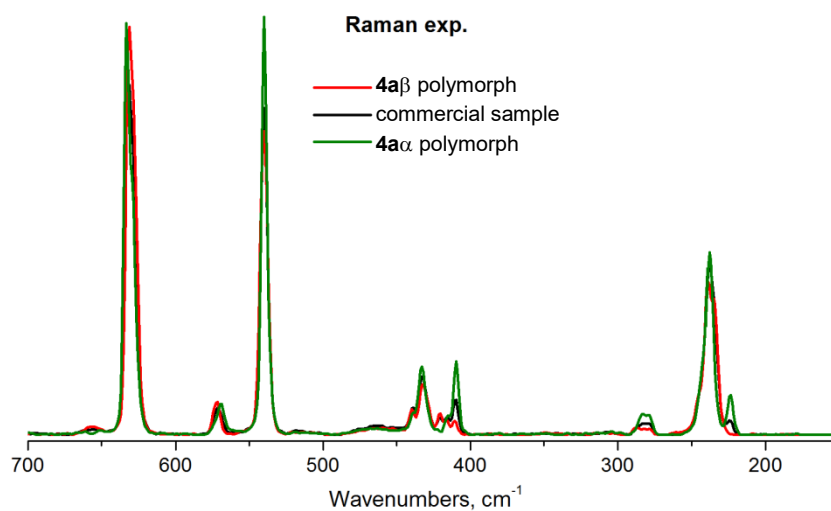

**Figure S8.** Experimental Raman spectra of  $4a\beta$  polymorph (in red), Madrid commercial sample (black) and  $4a\alpha$  polymorph (green) in the solid phase (powder) in the 700-150  $\text{cm}^{-1}$  spectral region. The three spectra have been normalized.

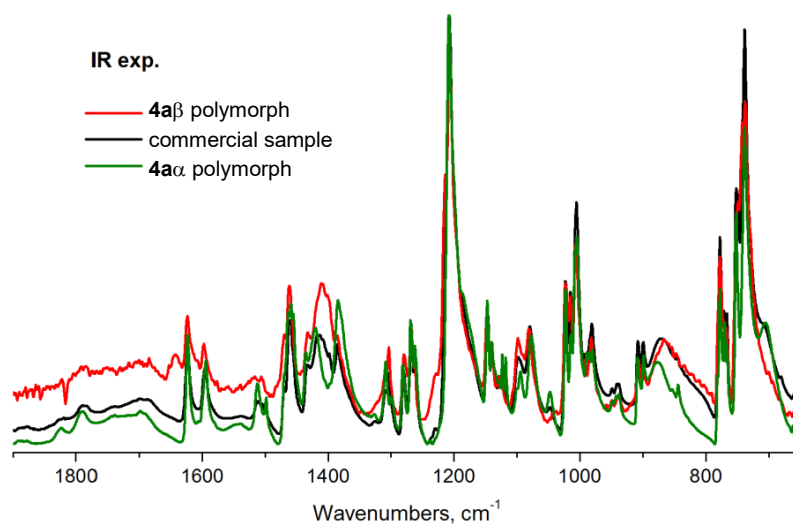

**Figure S9.** Experimental IR spectra of  $4a\beta$  polymorph (in red), Madrid commercial sample (black) and  $4a\alpha$  polymorph (green) in the solid phase (powder) in the 1900-650  $\text{cm}^{-1}$  spectral region. The three spectra have been normalized.

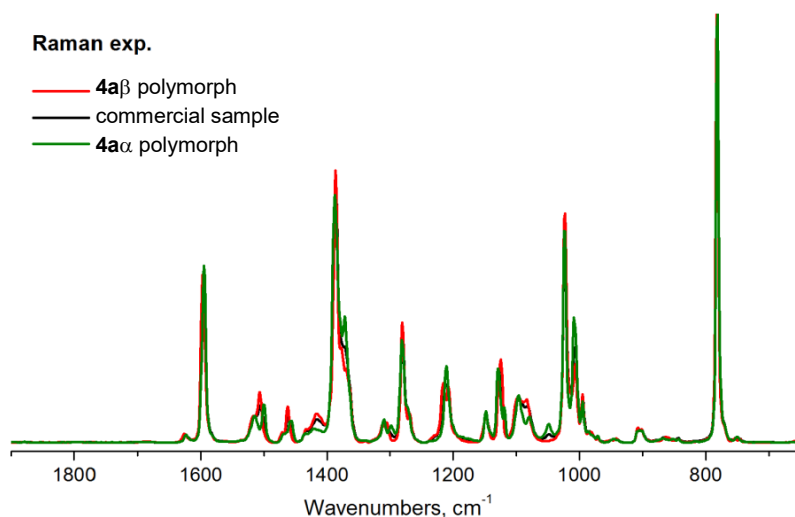

**Figure S10.** Experimental Raman spectra of **4a $\beta$**  polymorph (in red), Madrid commercial sample (black) and **4a $\alpha$**  polymorph (green) in the solid phase (powder) in the 1900-650  $\text{cm}^{-1}$  spectral region. The three spectra have been normalized.

**S15) Experimental VCD spectra of the **4a $\alpha$**  polymorph sample crystallized from toluene, **4a $\beta$**  polymorph and Madrid commercial sample (**4a $\alpha$**  + **4a $\beta$** ) compared with the theoretical VCD spectrum of **4a $\alpha$**  polymorph**

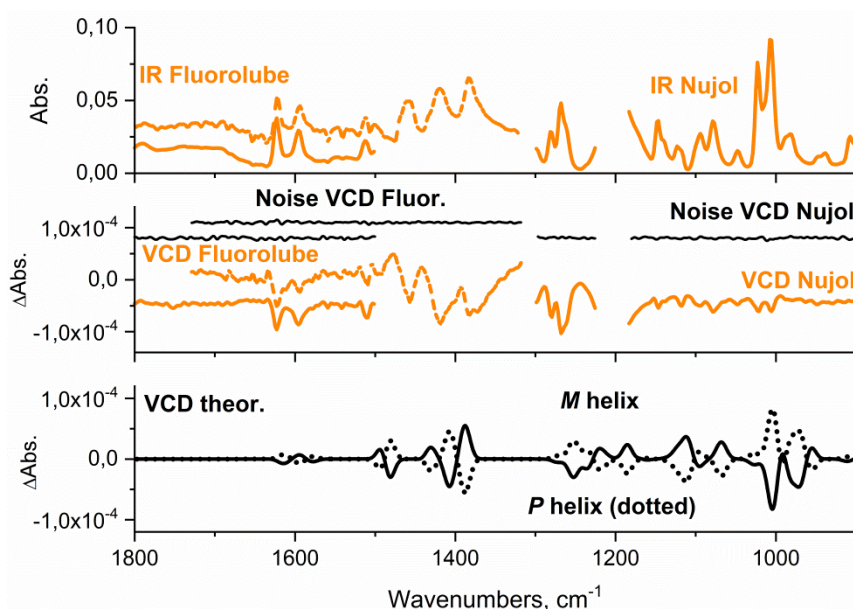

**Figure S11.** Experimental IR spectra (top) and experimental (middle) and theoretical (bottom) VCD spectra of the **4a $\alpha$**  polymorph sample crystallized in toluene, in fluorolube and nujol mulls in the 1800–900  $\text{cm}^{-1}$  spectral region. In the middle graphic, the VCD noise is also shown. The raw VCD spectra were corrected by subtracting nujol or fluorolube signals. A scaling frequency factor of 0.94 was used. Gaussian function, pitch = 1  $\text{cm}^{-1}$ , FWHM (Full Width Half Maximum) = 16  $\text{cm}^{-1}$ .

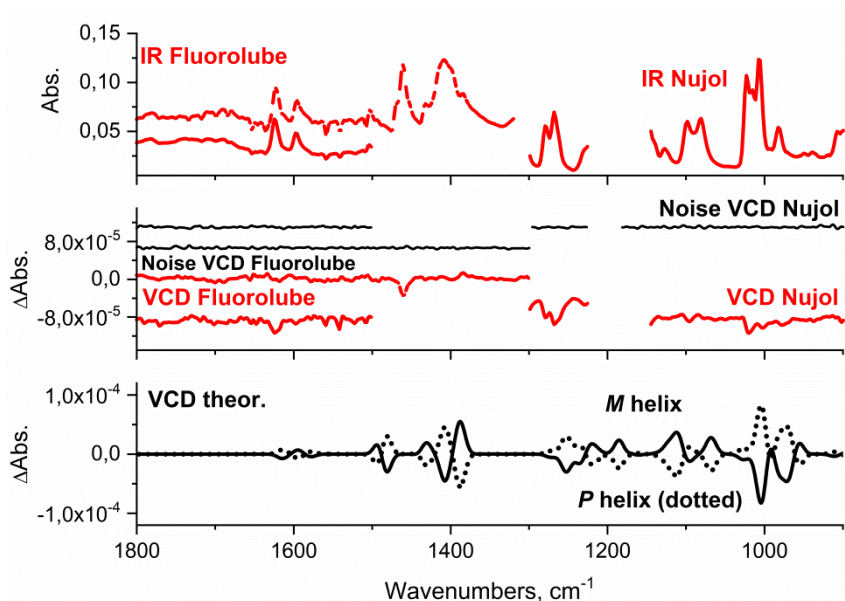

**Figure S12.** Experimental IR (top) and VCD (middle) spectra of **4a $\beta$**  polymorph sample in fluorolube and nujol mulls in the 1800–900  $\text{cm}^{-1}$  spectral region. In the middle graphic, the VCD noise is also shown. The raw VCD spectra were corrected by subtracting nujol or fluorolube signals. At the bottom, the theoretical VCD spectrum of **4a $\alpha$**  polymorph is shown. A scaling frequency factor of 0.94 was used. Gaussian function, pitch = 1  $\text{cm}^{-1}$ , FWHM (Full Width Half Maximum) = 16  $\text{cm}^{-1}$ .

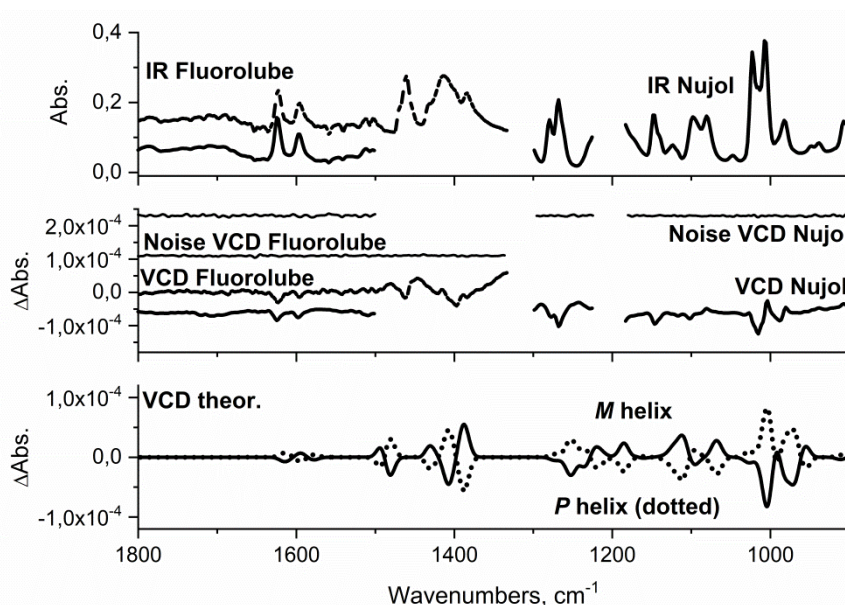

**Figure S13.** Experimental IR (top) and VCD (middle) spectra of Madrid commercial sample (**4a $\alpha$**  + **4a $\beta$** ) in fluorolube and nujol mulls in the 1800–900  $\text{cm}^{-1}$  spectral region. In the middle graphic, the VCD noise is also shown. The raw VCD spectra were corrected by subtracting nujol or fluorolube signals. At the bottom, the theoretical VCD spectrum of **4a $\alpha$**  polymorph is shown. A scaling frequency factor of 0.94 was used. Gaussian function, pitch = 1  $\text{cm}^{-1}$ , FWHM (Full Width Half Maximum) = 8  $\text{cm}^{-1}$ .

**S16) Experimental VCD spectra of the four orientations recorded for the 4a $\alpha$  polymorph sample crystallized from acetone**

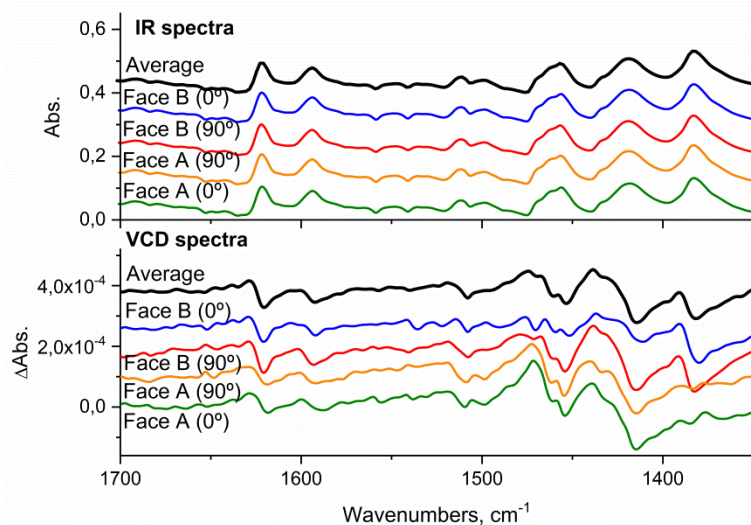

**Figure S14.** Experimental IR spectra (top) and VCD (bottom) of 4a $\alpha$  polymorph in fluorolube mineral oil, showing the spectra recorded in selected orientations, face A (0 °), face A (90 °), face B (90 °) and face B (0 °), and the average VCD spectrum.

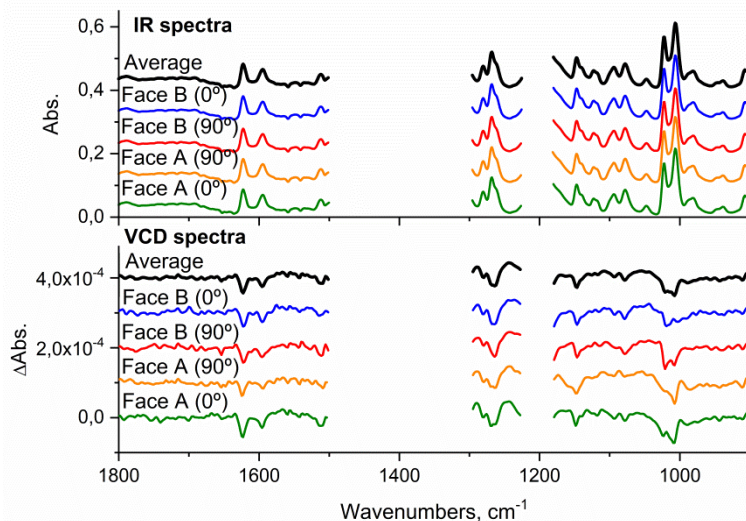

**Figure S15.** Experimental IR spectra (top) and VCD (bottom) of 4a $\alpha$  polymorph in nujol mineral oil, showing the spectra recorded in selected orientations, face A (0 °), face A (90 °), face B (90 °) and face B (0 °), and the average VCD spectrum.

**S17) Experimental VCD spectra of the 4a $\alpha$  polymorph sample crystallized from acetone compared with the theoretical VCD spectra of 4a $\alpha$  polymorph (trimer 4-6, trimer 5-7 and tetramer 4-7)**

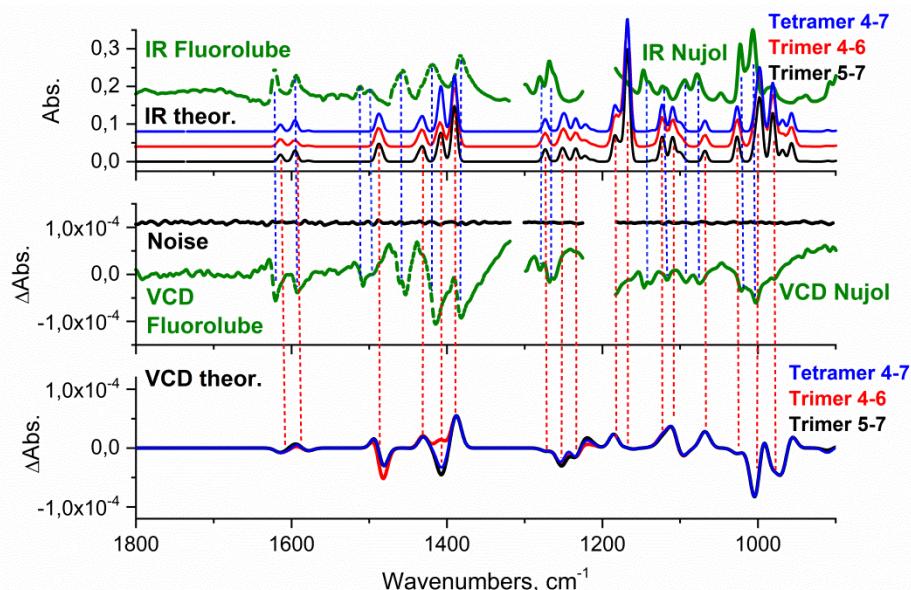

**Figure S16.** Experimental and theoretical IR spectra (top) and experimental (middle) and theoretical (bottom, *M* helix) VCD spectra of polymorph **4a $\alpha$**  in fluorolube and nujol mulls in the 1800–900  $\text{cm}^{-1}$  spectral region. The VCD noise is also shown the middle graphic. The VCD spectra were corrected by subtracting the nujol or fluorolube signals. A scaling frequency factor of 0.94 was used. Gaussian function, pitch = 1  $\text{cm}^{-1}$ , FWHM (Full Width Half Maximum) = 8  $\text{cm}^{-1}$  (IR spectrum) and 16  $\text{cm}^{-1}$  (VCD spectrum).

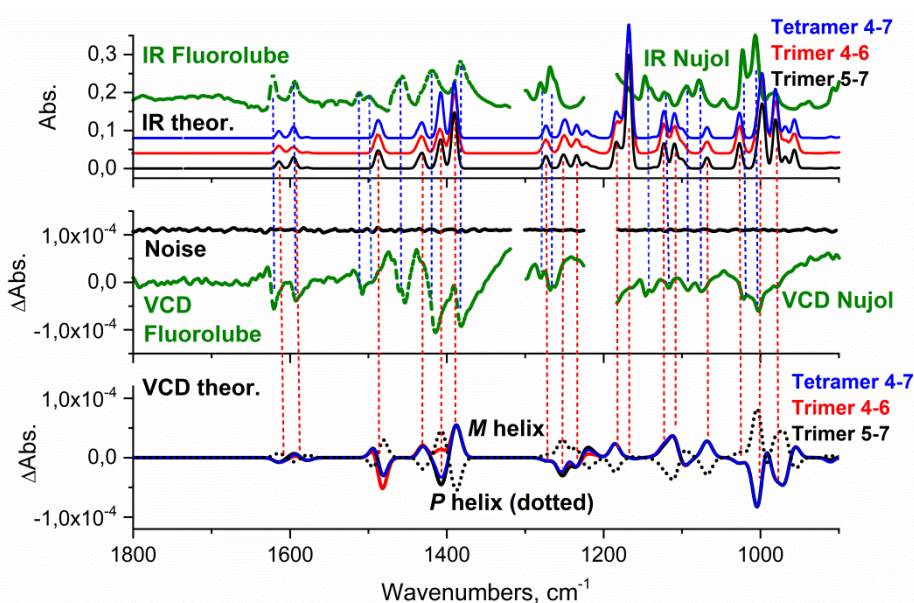

**Figure S17.** Experimental and theoretical IR spectra (top) and experimental (middle) and theoretical (bottom, *P* and *M* helices) VCD spectra of polymorph **4a $\alpha$**  in fluorolube and nujol mulls in the 1800–900  $\text{cm}^{-1}$  spectral region. The VCD noise is also shown the middle graphic. The VCD spectra were corrected by subtracting the nujol or fluorolube signals. A scaling frequency factor of 0.94 was used. Gaussian function, pitch = 1  $\text{cm}^{-1}$ , FWHM (Full Width Half Maximum) = 8  $\text{cm}^{-1}$  (IR spectrum) and 16  $\text{cm}^{-1}$  (VCD spectrum).



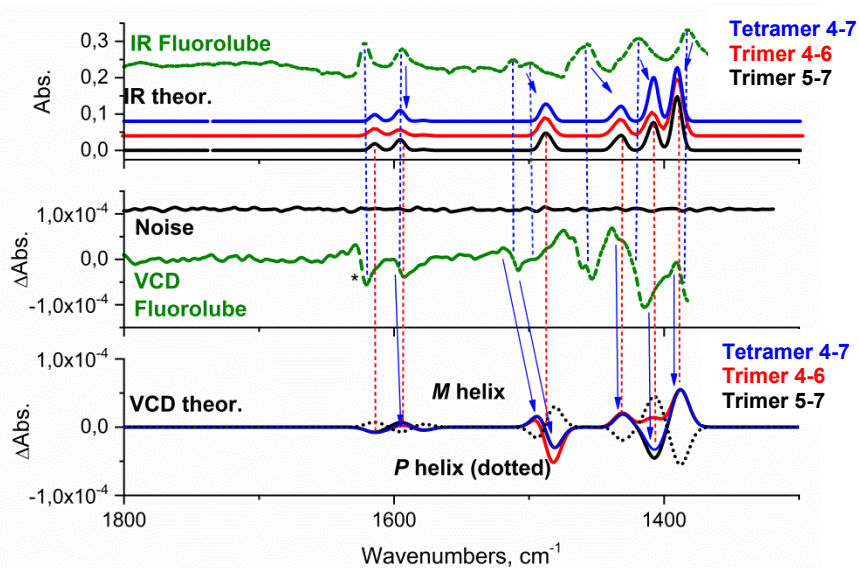

**Figure S18.** Experimental and theoretical IR spectra (top) and experimental (middle) and theoretical (bottom) VCD spectra of polymorph **4a $\alpha$**  in fluorolube mull in the 1800–1300  $\text{cm}^{-1}$  spectral region. The VCD noise is also shown the middle graphic. The VCD spectra were corrected by subtracting the fluorolube signals. A scaling frequency factor of 0.94 was used. Gaussian function, pitch = 1  $\text{cm}^{-1}$ , FWHM (Full Width Half Maximum) = 8  $\text{cm}^{-1}$  (IR spectrum) and 16  $\text{cm}^{-1}$  (VCD spectrum). The band marked with a “\*” was not analyzed because it also appeared in the VCD spectrum for the **4a $\beta$**  sample (see Fig. S12).
